# Supplementary material for: GC/EI-MS method for the determination of phytosterols in vegetable oils
Source: Springer Nature journal article supplement (doi:10.1007/s00216-021-03730-9), 2021-10-30
Supplement: MOESM1 [file 216_2021_3730_MOESM1_ESM-1.pdf]

**Analytical and Bioanalytical Chemistry**

**Electronic Supplementary Material**

**GC/EI-MS Method for the Determination of Phytosterols in Vegetable Oils**

Sarah Schlag<sup>1</sup>, Yining Huang<sup>1</sup>, Walter Vetter<sup>1\*</sup>

<sup>1</sup>University of Hohenheim, Institute of Food Chemistry (170b), Garbenstraße 28, D-70599 Stuttgart,  
Germany

\*Corresponding author

Tel: +49 711 459 24016

Fax: +49 711 459 24377

E-mail: [walter.vetter@uni-hohenheim.de](mailto:walter.vetter@uni-hohenheim.de)

**Table S1** FAP retention indices ( $RI_{FAP}$ ) of silylated sterols in a crude  $\beta$ -sitosterol standard (unsaturated sterols calculated as  $\beta$ -sitosterol  $\sim 85\%$ ) as determined by GC/MS-SIM

| injected amount [ng] | measurement | cholesterol | campesterol | stigmasterol | $\beta$ -sitosterol |
|----------------------|-------------|-------------|-------------|--------------|---------------------|
| 12.45                | 1           | 2127.7      | 2224.7      | 2246.5       | 2306.0              |
|                      | 2           | 2127.6      | 2224.6      | 2246.5       | 2305.9              |
| 24.9                 | 1           | 2127.8      | 2224.9      | 2246.7       | 2305.9              |
|                      | 2           | 2127.5      | 2224.8      | 2246.5       | 2305.8              |
| 49.8                 | 1           | 2127.8      | 2224.5      | 2246.7       | 2306.0              |
|                      | 2           | 2127.6      | 2225.0      | 2246.8       | 2306.0              |
| 74.7                 | 1           | 2127.8      | 2224.7      | 2246.7       | 2306.2              |
|                      | 2           | 2127.7      | 2224.9      | 2246.9       | 2306.1              |
| 99.6                 | 1           | 2127.9      | 2224.8      | 2246.8       | 2306.4              |
|                      | 2           | 2127.6      | 2224.9      | 2246.6       | 2306.4              |
| 124.5                | 1           | 2128.0      | 2224.9      | 2246.6       | 2306.3              |
|                      | 2           | 2127.7      | 2224.7      | 2246.9       | 2306.4              |
| maximum              |             | 2128.0      | 2225.0      | 2246.9       | 2306.4              |
| minimum              |             | 2127.5      | 2224.5      | 2246.5       | 2305.8              |
| deviation            |             | 0.5         | 0.5         | 0.4          | 0.6                 |
| STABW                |             | 0.1         | 0.1         | 0.1          | 0.2                 |

**Table S2** Comparison of FAP retention indices ( $RI_{FAP}$ ) of silylated sterols and triterpene alcohols as determined by GC/MS-SIM in samples from different series of measurements

|                           | A      | B      | C      | D      | max    | min    | max. dev. | STDEV |
|---------------------------|--------|--------|--------|--------|--------|--------|-----------|-------|
| 24-methylenecholesterol   | -      | 2215.3 | 2216.0 | 2215.6 | 2216.0 | 2215.3 | 0.7       | 0.4   |
| campesterol               | 2224.4 | 2223.1 | 2223.7 | 2223.7 | 2224.4 | 2223.1 | 1.3       | 0.5   |
| stigmasterol              | 2247.2 | 2246.2 | 2246.2 | 2246.1 | 2247.2 | 2246.1 | 1.1       | 0.5   |
| $\Delta 7$ -campesterol   | 2283.5 | 2282.0 | 2282.7 | 2282.1 | 2283.5 | 2282.0 | 1.5       | 0.7   |
| cleroesterol              | 2291.2 | 2289.7 | 2289.1 | 2289.5 | 2291.2 | 2289.1 | 2.1       | 1.0   |
| $\beta$ -sitosterol       | 2306.2 | 2305.8 | 2305.6 | 2304.8 | 2306.2 | 2304.8 | 1.4       | 0.6   |
| $\Delta 5$ -avenasterol   | 2319.6 | 2318.7 | 2318.7 | 2318.4 | 2319.6 | 2318.4 | 1.2       | 0.5   |
| $\beta$ -amyirin          | 2327.3 | 2325.5 | 2326.2 | 2325.8 | 2327.3 | 2325.5 | 1.8       | 0.8   |
| stigmasta-5,24(25)-dienol | 2341.4 | 2341.0 | 2340.8 | 2340.0 | 2341.4 | 2340.0 | 1.4       | 0.6   |
| gramisterol               | 2354.0 | 2352.9 | 2353.5 | -      | 2354.0 | 2352.9 | 1.1       | 0.6   |
| $\Delta 7$ -sitosterol    | 2364.0 | 2363.3 | 2363.1 | 2362.0 | 2364.0 | 2362.0 | 2.0       | 0.8   |
| $\alpha$ -amyirin         | 2365.5 | -      | 2365.0 | 2364.7 | 2365.5 | 2364.7 | 0.8       | 0.4   |
| cycloartenol              | 2370.9 | 2369.8 | 2369.1 | 2369.0 | 2370.9 | 2369.0 | 1.9       | 0.9   |
| $\Delta 7$ -avenasterol   | 2378.6 | 2377.6 | 2377.7 | -      | 2378.6 | 2377.6 | 1.0       | 0.6   |
| 24-methylenecycloartanol  | 2423.2 | 2422.3 | 2422.4 | -      | 2423.2 | 2422.3 | 0.9       | 0.5   |
| citrostadienol            | 2457.2 | 2456.4 | 2456.8 | -      | 2457.2 | 2456.4 | 0.8       | 0.4   |

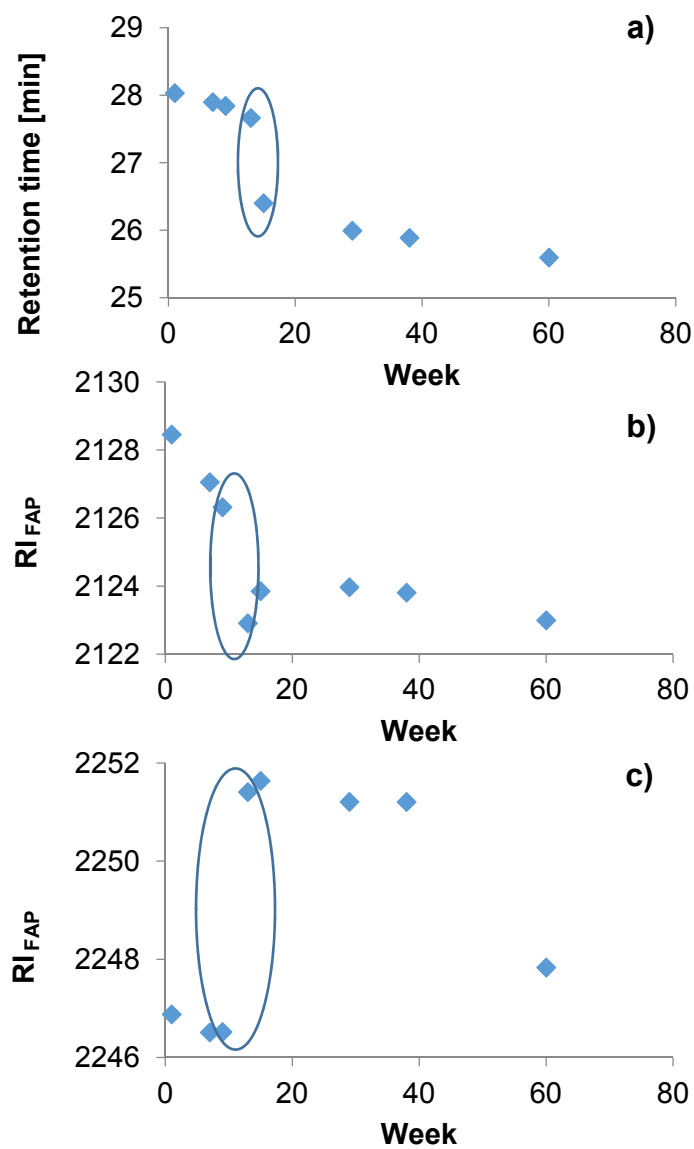

**Fig. S1** Changes in the (a) retention time of 21:0-P, (b) RI<sub>FAP</sub> of silylated cholesterol and (c) RI<sub>FAP</sub> of silylated stigmasterol on the same column in the course of a year. Jumps are marked with a circle

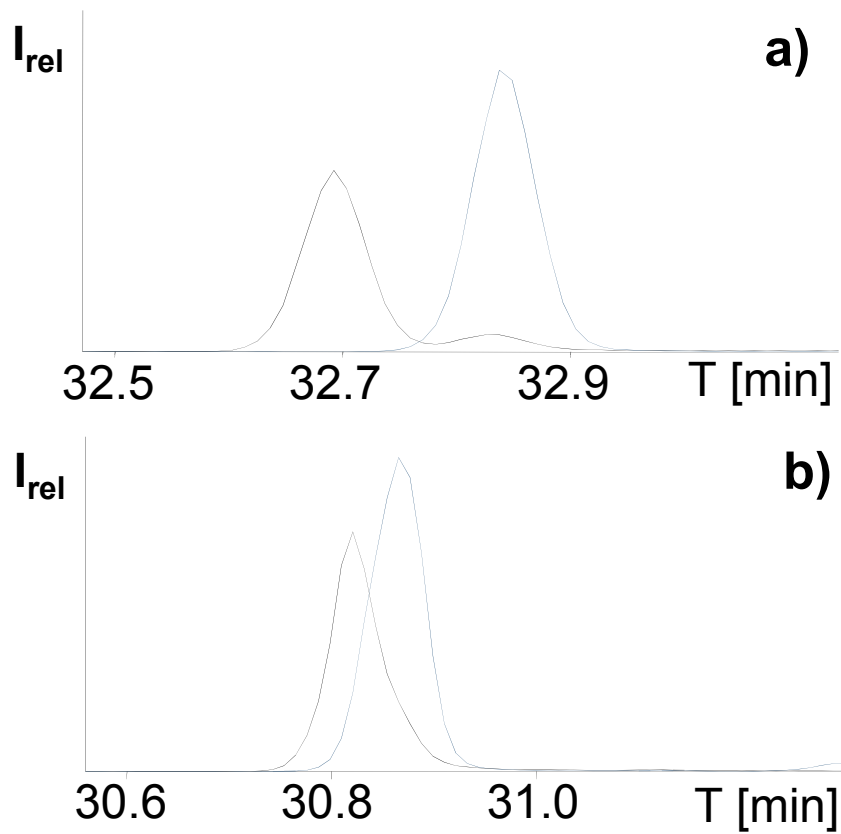

**Fig. S2.** GC/EI-MS SIM chromatogram of the silylated unsaponifiable matter from sunflower oil (a) from December 19 and (b) from October 20 with  $m/z$  486 (blue) for  $\beta$ -sitosterol and  $m/z$  113 (black) for 23:0-P

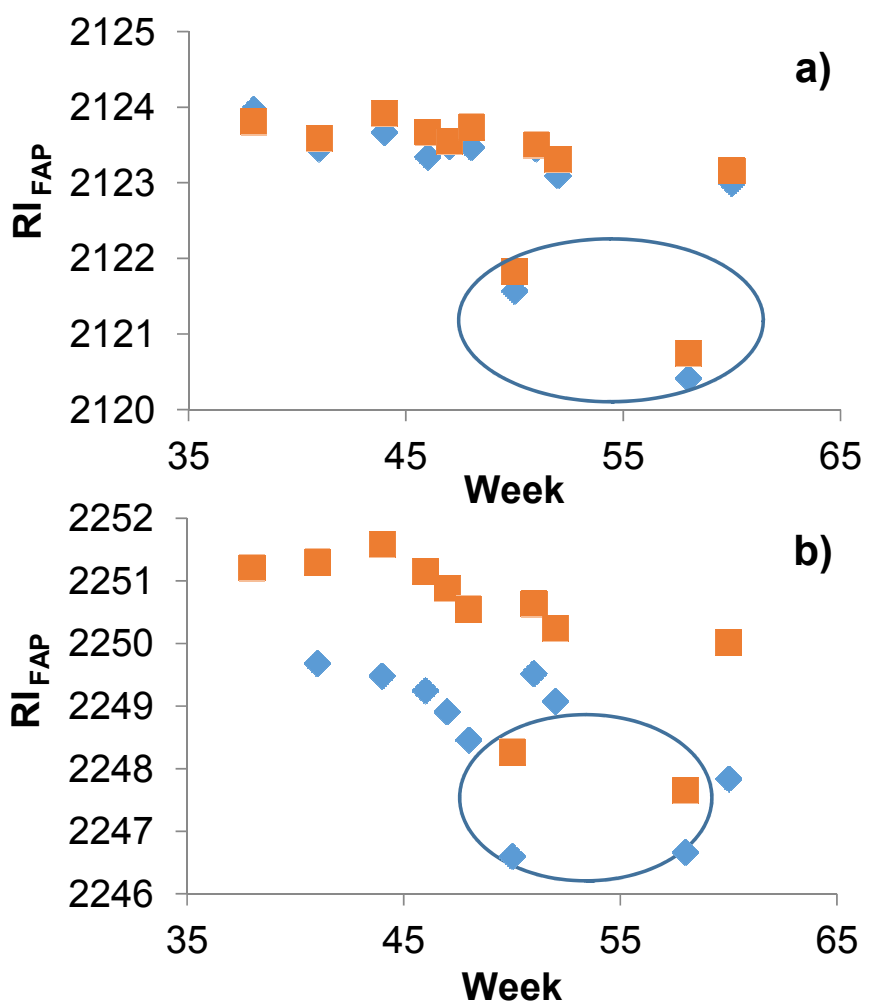

**Fig. S3.**  $RI_{FAP}$  from silylated (a) cholesterol and (b) stigmaterol determined with the RTL method (red, squares) and with the n-method (blue, ruts). Outliers are circled

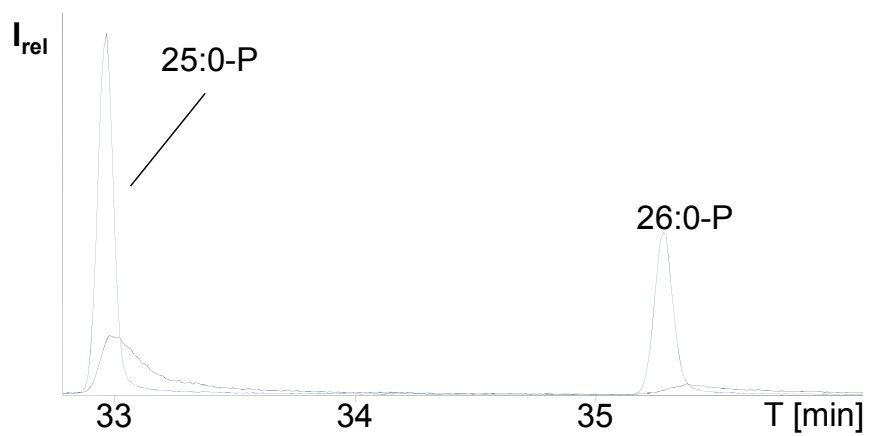

**Fig. S4** GC/MS-SIM chromatogram of the FAP-IS at  $m/z$  113 before (black) and after system maintenance (blue)

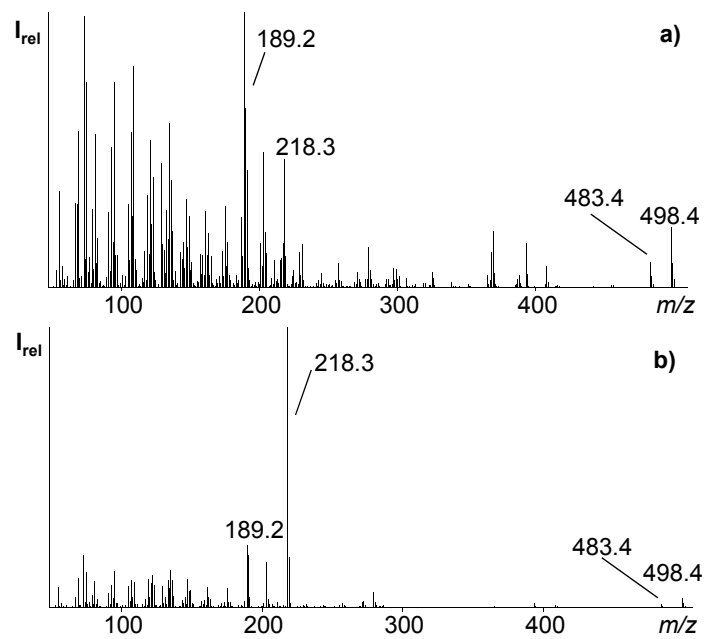

**Fig. S5** GC/MS-*full scan* mass spectrums of silylated (a) lupeol and (b)  $\alpha$ -amyrin in shea butter

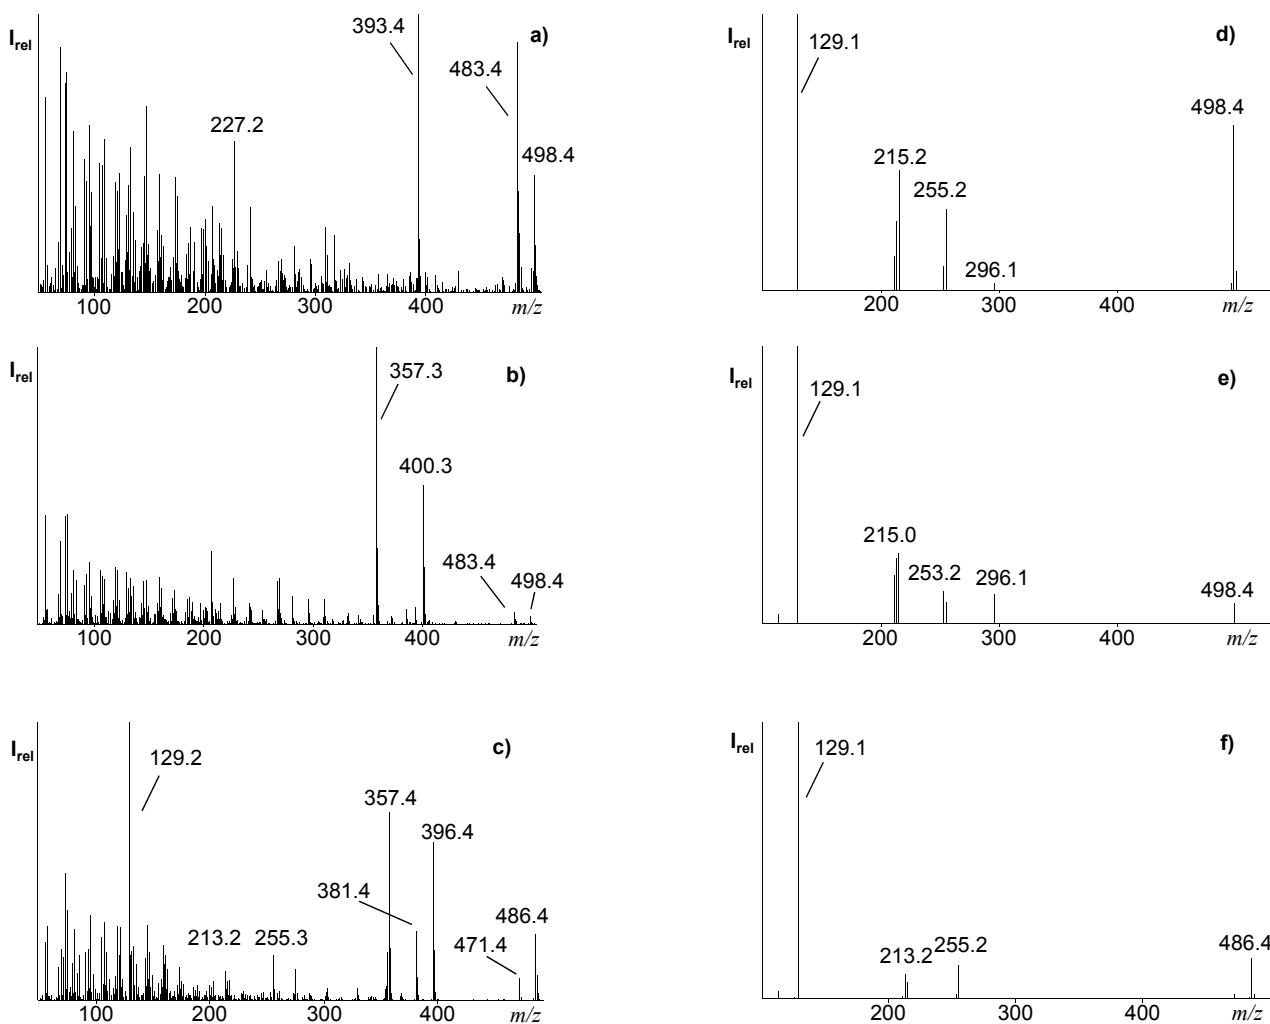

**Fig. S6.** GC/MS full scan mass spectra of silylated (a) citrostadienol, (b) lanosterol (measured on a Optima-5 MS (30 m, 0.25 mm i.d., 0.25  $\mu$ m film thickness column) and (c)  $\beta$ -sitosterol as well as GC/MS-SIM mass spectra of silylated (d) citrostadienol, (e) lanosterol (measured on a Optima-5 MS (30 m, 0.25 mm i.d., 0.25  $\mu$ m film thickness column) and (f)  $\beta$ -sitosterol
